# Supplementary material
Source: PubMed Central journal article supplement (PMC4658492)
Supplement: supp_115.065482_Supplements_65482.pdf [file supp_115.065482_Supplements_65482.pdf]

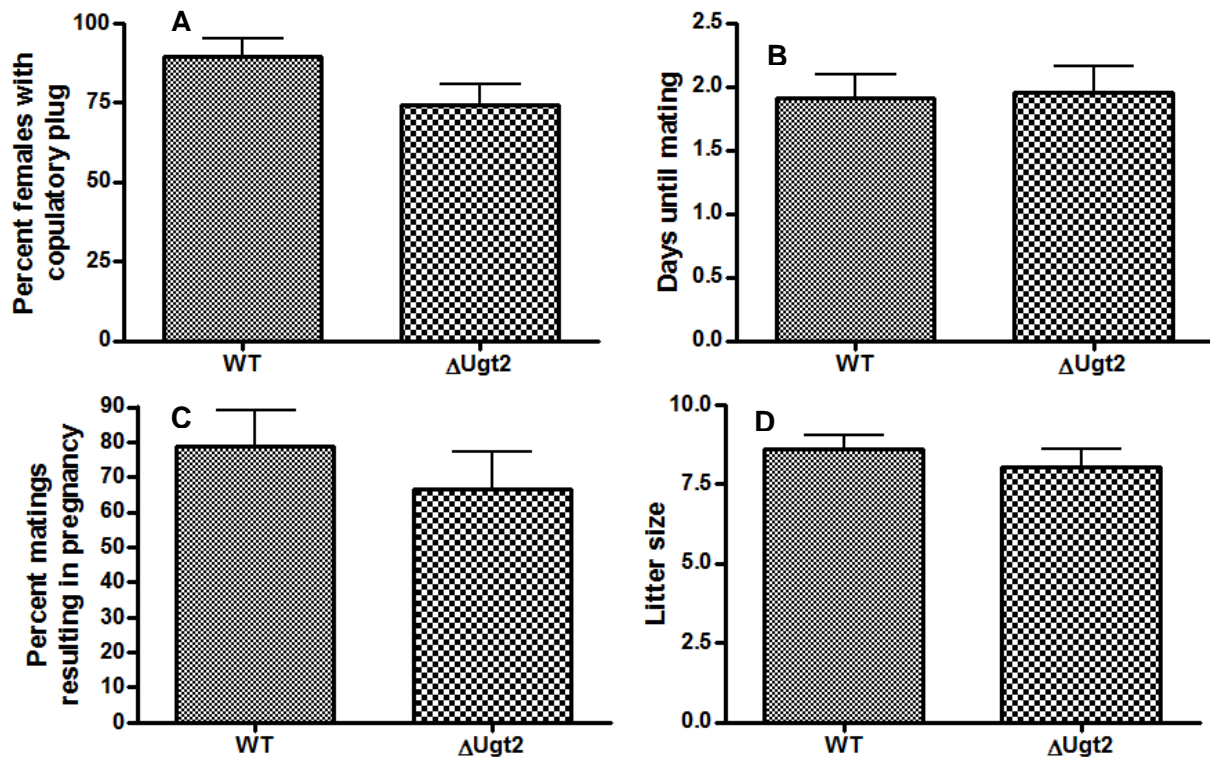

**Supplemental Figure 2. Reproductive studies on WT and  $\Delta Ugt2$  males mated with WT females.** 11 WT and 11  $\Delta Ugt2$  males were housed individually. Two to three WT females were introduced into each cage and checked for copulation pugs over the following 5 days. Females that had mated were removed into individual cages. The number of days of co-housing before copulation, the number of matings, and the number of pups obtained from each mating were recorded. Compared to WT males,  $\Delta Ugt2$  males mated with a slightly lower percentage of cohoused females (A), had similar numbers of days until copulation plugs were observed (B), had a slightly lower percentage of matings resulting in pregnancy (C), and produced slightly smaller litters (D) on average. Overall,  $\Delta Ugt2$  males appeared to exhibit slightly lower fertility/fecundity, but no parameter examined was significantly different in an unpaired Student's *t* test. Error bars represent S.E.M., *n*=11 males of each genotype.

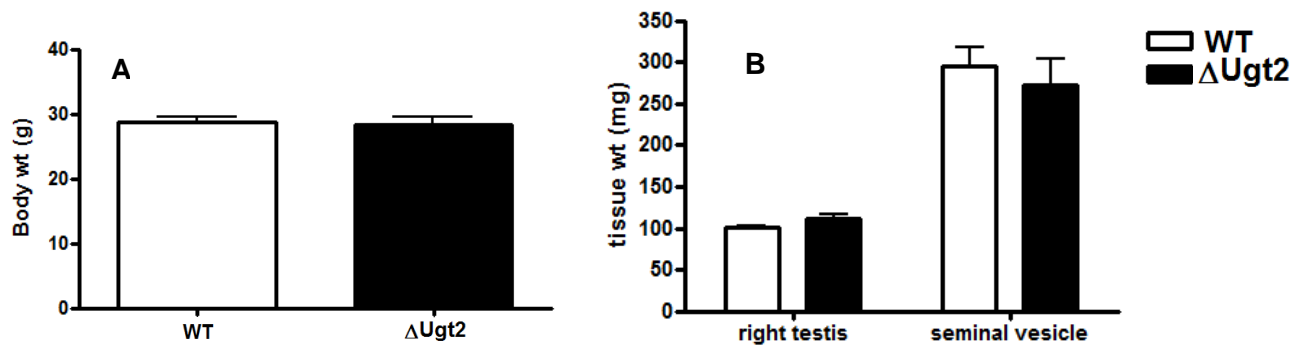

**Supplemental Figure 3. Body and reproductive organ weights of WT and  $\Delta Ugt2$  male mice.** A. Body weight of WT and  $\Delta Ugt2$  mice. B. Right testis and seminal vesicle from both groups were removed and weighed. There was no significant difference in body weight, testis weight and seminal vesicle weight. Error bars represent S.E.M., n=6.

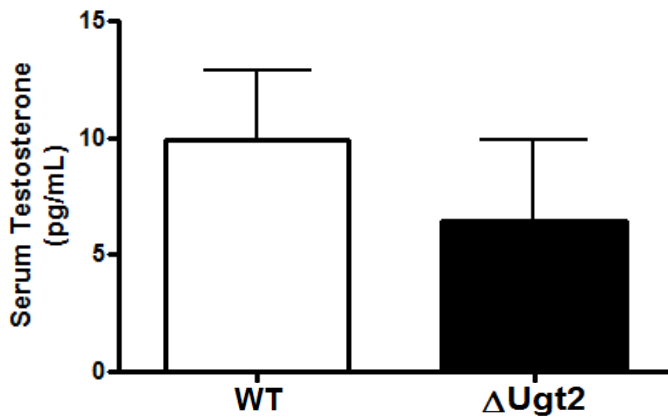

**Supplemental Figure 4. Serum testosterone levels in WT and  $\Delta Ugt2$  male mice.** Testosterone levels were measured by ELISA in mature (2-5 months old) male mice. No Significant difference in serum testosterone concentration was observed between the groups in an unpaired Student's *t* test. Error bars represent S.E.M., n=6.

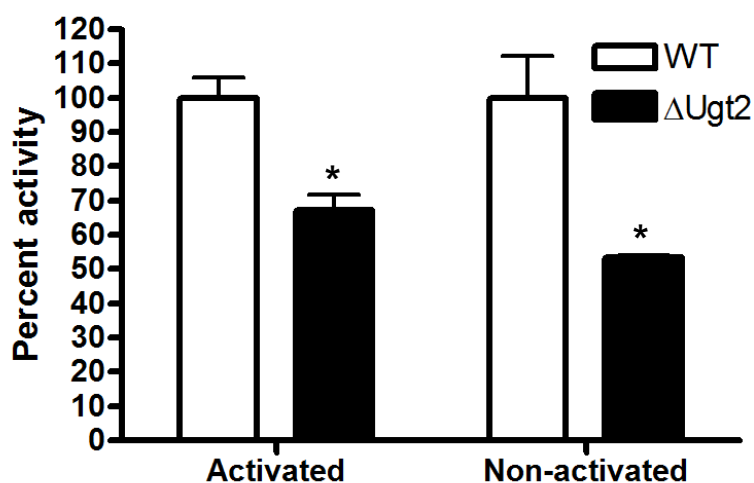

**Supplemental Figure 5. Effect of microsomal activation with alamethicin on BPA glucuronidation.** Reaction mixtures contained 0.1M Tris buffer (pH 7.5), 100 μM BPA, 4 mM magnesium chloride, 5 mM UDPGA, and microsomal protein. Activated reaction mixtures contained 25 μg/mL alamethicin. Activities were normalized to microsomal protein concentration and expressed as percentage of average WT activity for each experimental condition. Both in the presence and absence of alamethicin, activities differed significantly between WT and ΔUgt2 microsomes ( $p < 0.05$  in both cases) in Student's *t* tests. Error bars represent S.E.M.,  $n=3$ .

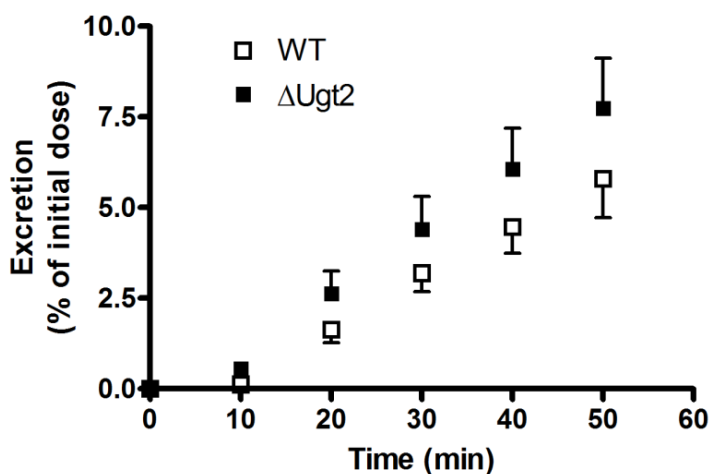

**Supplemental Figure 6. *In vivo* glucuronidation of BPA in WT and ΔUgt2 female mice.** Age- and weight-matched WT and ΔUgt2 mice were dosed with 2 mg BPA/kg bodyweight and bile was collected by the same method described for males. Biliary excretion rates were not significantly different in a Student's *t* test. Error bars represent S.E.M.,  $n=3$ .

## Supplemental Methods

### SYBR green qPCR primers

|               |                          |
|---------------|--------------------------|
| Common primer | AGGCGTTGACATAGGCTTCAAATT |
| Ugt1a1        | TCATGCCCAACATGGTTTTTATTG |
| Ugt1a7c       | ACCTGTGATGCCCAATGTGATCTA |
| Ugt1a9        | AGGCCTGTGATGCCTAACATGGTC |

### $\Delta$ Ugt2 genotyping primers

|                          |                          |
|--------------------------|--------------------------|
| Common primer            | CACAAATTTGTATGTGTTTGACT  |
| Endogenous locus         | CTGCACTCAGGTGCATTTCTACAC |
| Deleted locus (GPRA Neo) | AAATGCCTGCTCTTTACTGAAGG  |

### Southern blotting probes

|                          |                          |
|--------------------------|--------------------------|
| Deletion targeting probe |                          |
| Upper                    | ATTCATCTATTCCAATCCTTATC  |
| Lower                    | GAAAGGGGTAAGAGGAGAAGAGTA |
| Universal binding probe  |                          |
| Upper                    | TCCCCACAGGAAGCAACAGGATCT |
| Lower                    | GTGTGGCCGATGGAATTCAGTCAT |

**$\beta$ -Glucuronidase protocol.** Glucuronides were cleaved by addition of 20  $\mu$ L of 5 mg/mL  $\beta$ -Glucuronidase (Sigma) to microsomal reaction products or bile samples. Microsomal incubations were acidified to pH 5.2 by addition of HCl prior to  $\beta$ -glucuronidase treatment. Bile samples did not need pH adjustment as biliary pH is 5 to 6. After incubation with  $\beta$ -glucuronidase for 4 hours at 37°C, cleavage reactions were terminated by addition of ice-cold 4% acetic acid in methanol and vortex mixing. Precipitated proteins were removed by centrifugation (10 min, 10,000 x g) and supernatants were then analyzed by HPLC.
